# Supplementary material
Source: PubMed Central journal article supplement (PMC1199534)
Supplement: genores_gr.3907305_2.pdf [file genores_gr.3907305_2.pdf]

Supplemental Table 3

Correspondences of Cotton Chromosomal Regions with *Arabidopsis* Duplications

| Cotton<br>Chr <sup>a</sup> | Length |             | Length of syntenic regions |      |       |      | % of total syntenic regions associated with indicated number of<br><i>Arabidopsis</i> chromosomes |      |      |      |      |      |      |      |      |      |
|----------------------------|--------|-------------|----------------------------|------|-------|------|---------------------------------------------------------------------------------------------------|------|------|------|------|------|------|------|------|------|
|                            | cM     | %<br>genome | CS2                        |      | FISH  |      | CS2                                                                                               | FISH | CS2  | FISH | CS2  | FISH | CS2  | FISH | CS2  | FISH |
|                            |        |             | cM                         | %    | cM    | %    | 1 <sup>b</sup>                                                                                    | 1    | 2    | 2    | 3    | 3    | 4    | 4    | >5   | >5   |
| C01                        | 195.4  | 8.4         | 107.4                      | 55.0 | 54.7  | 28.0 | 82.4                                                                                              | 84.1 | 17.6 | 15.9 | 0.0  | 0.0  | 0.0  | 0.0  | 0.0  | 0.0  |
| C02                        | 176.4  | 7.6         | 100.7                      | 57.1 | 70.5  | 40.0 | 60.9                                                                                              | 63.8 | 21.3 | 32.5 | 17.9 | 3.7  | 0.0  | 0.0  | 0.0  | 0.0  |
| C03                        | 120.7  | 5.2         | 90.6                       | 75.1 | 74.9  | 62.1 | 30.4                                                                                              | 60.3 | 39.3 | 33.9 | 10.5 | 5.7  | 0.0  | 0.0  | 19.9 | 0.0  |
| C04                        | 183.8  | 7.9         | 70.3                       | 38.2 | 39.5  | 21.5 | 35.6                                                                                              | 88.6 | 20.9 | 11.4 | 31.9 | 0.0  | 11.7 | 0.0  | 0.0  | 0.0  |
| C05                        | 191.9  | 8.3         | 155.6                      | 81.1 | 48.6  | 25.3 | 52.6                                                                                              | 93.6 | 21.5 | 6.4  | 19.7 | 0.0  | 0.0  | 0.0  | 6.2  | 0.0  |
| C06                        | 172.6  | 7.4         | 84.0                       | 48.7 | 26.6  | 15.4 | 39.4                                                                                              | 51.9 | 53.5 | 44.7 | 7.1  | 3.4  | 0.0  | 0.0  | 0.0  | 0.0  |
| C07                        | 217.2  | 9.3         | 141.2                      | 65.0 | 90.5  | 41.7 | 45.0                                                                                              | 66.1 | 28.8 | 29.2 | 19.2 | 4.8  | 0.0  | 0.0  | 6.9  | 0.0  |
| C08                        | 159.5  | 6.9         | 126.0                      | 79.0 | 59.3  | 37.2 | 65.9                                                                                              | 49.2 | 15.4 | 41.3 | 14.1 | 8.3  | 3.7  | 1.2  | 0.9  | 0.0  |
| C09                        | 264.6  | 11.4        | 173.8                      | 65.7 | 76.7  | 29.0 | 60.8                                                                                              | 84.4 | 27.8 | 13.2 | 3.3  | 1.6  | 8.1  | 0.9  | 0.0  | 0.0  |
| C10                        | 172.6  | 7.4         | 69.7                       | 40.4 | 54.9  | 31.8 | 85.1                                                                                              | 83.6 | 14.9 | 16.4 | 0.0  | 0.0  | 0.0  | 0.0  | 0.0  | 0.0  |
| C11                        | 170.2  | 7.3         | 86.6                       | 50.9 | 45.1  | 26.5 | 65.4                                                                                              | 89.6 | 29.0 | 8.2  | 5.7  | 2.2  | 0.0  | 0.0  | 0.0  | 0.0  |
| C12                        | 101.7  | 4.4         | 49.4                       | 48.6 | 24.5  | 24.1 | 53.8                                                                                              | 78.0 | 31.0 | 13.5 | 15.2 | 8.6  | 0.0  | 0.0  | 0.0  | 0.0  |
| C13                        | 198.1  | 8.5         | 116.8                      | 59.0 | 46.3  | 23.4 | 44.0                                                                                              | 77.8 | 17.9 | 22.2 | 19.1 | 0.0  | 7.5  | 0.0  | 11.5 | 0.0  |
| Total                      | 2324.7 | 100.0       | 1372.1                     | 59.0 | 712.1 | 30.6 | 55.6                                                                                              | 73.8 | 25.5 | 23.0 | 12.5 | 3.0  | 2.6  | 0.2  | 3.8  | 0.0  |

<sup>a</sup>Based on the hypothetical ancestral chromosomes: does not correspond to published nomenclature for modern tetraploid chromosomes (Rong et al 2004)

<sup>b</sup>Number of chromosome segments involved in synteny

Supplemental Table 4

Correspondence of *Arabidopsis*  $\alpha$  Duplications with Cotton Hypothetical Ancestral Chromosomes

| Ara Dupli    | Length |          | Length of syntenic regions |      |       |      | % of total syntenic regions associated with indicated number of cotton chromosomes |       |      |      |      |      |      |      |      |      |
|--------------|--------|----------|----------------------------|------|-------|------|------------------------------------------------------------------------------------|-------|------|------|------|------|------|------|------|------|
|              | Gene#  | % genome | CS2                        |      | Fish  |      | CS2                                                                                | Fish  | CS2  | Fish | CS2  | Fish | CS2  | Fish | CS2  | Fish |
|              |        |          | Gene#                      | %    | Gene# | %    | 1 <sup>a</sup>                                                                     | 1     | 2    | 2    | 3    | 3    | 4    | 4    | >5   | >5   |
| $\alpha$ 01  | 625    | 2.7      | 121                        | 19.3 | 180   | 28.8 | 100.0                                                                              | 77.2  | 0.0  | 22.8 | 0.0  | 0.0  | 0.0  | 0.0  | 0.0  | 0.0  |
| $\alpha$ 02  | 1021   | 4.4      | 573                        | 56.1 | 281   | 27.5 | 54.5                                                                               | 59.1  | 33.7 | 33.8 | 11.9 | 7.1  | 0.0  | 0.0  | 0.0  | 0.0  |
| $\alpha$ 03  | 943    | 4.1      | 616                        | 65.3 | 329   | 34.9 | 51.0                                                                               | 50.2  | 14.6 | 49.8 | 19.2 | 0.0  | 15.3 | 0.0  | 0.0  | 0.0  |
| $\alpha$ 04  | 422    | 1.8      | 188                        | 44.5 | 142   | 33.6 | 86.7                                                                               | 36.6  | 13.3 | 63.4 | 0.0  | 0.0  | 0.0  | 0.0  | 0.0  | 0.0  |
| $\alpha$ 05  | 2413   | 10.4     | 1225                       | 50.7 | 694   | 28.8 | 52.9                                                                               | 63.7  | 23.7 | 35.7 | 13.1 | 0.6  | 10.3 | 0.0  | 0.0  | 0.0  |
| $\alpha$ 06  | 644    | 2.8      | 401                        | 62.2 | 277   | 43.0 | 37.4                                                                               | 53.8  | 47.9 | 26.0 | 14.7 | 20.2 | 0.0  | 0.0  | 0.0  | 0.0  |
| $\alpha$ 07  | 441    | 1.9      | 153                        | 34.7 | 55    | 12.5 | 99.3                                                                               | 100.0 | 1.3  | 0.0  | 0.0  | 0.0  | 0.0  | 0.0  | 0.0  | 0.0  |
| $\alpha$ 08  | 1583   | 6.8      | 741                        | 46.8 | 263   | 16.6 | 73.4                                                                               | 79.1  | 26.6 | 20.9 | 0.0  | 0.0  | 0.0  | 0.0  | 0.0  | 0.0  |
| $\alpha$ 09  | 260    | 1.1      | 170                        | 65.4 | 65    | 25.0 | 18.2                                                                               | 100.0 | 75.9 | 0.0  | 5.9  | 0.0  | 0.0  | 0.0  | 0.0  | 0.0  |
| $\alpha$ 10  | 2411   | 10.4     | 1301                       | 54.0 | 784   | 32.5 | 72.9                                                                               | 71.2  | 21.6 | 18.9 | 5.5  | 8.3  | 0.0  | 1.7  | 0.0  | 0.0  |
| $\alpha$ 11  | 2321   | 10.0     | 1316                       | 56.7 | 1031  | 44.4 | 40.0                                                                               | 52.0  | 28.8 | 44.6 | 15.4 | 3.0  | 5.7  | 0.4  | 10.0 | 0.0  |
| $\alpha$ 12  | 1180   | 5.1      | 755                        | 64.0 | 419   | 35.5 | 65.2                                                                               | 87.4  | 19.7 | 12.6 | 6.6  | 0.0  | 8.5  | 0.0  | 0.0  | 0.0  |
| $\alpha$ 13  | 289    | 1.3      | 270                        | 93.4 | 99    | 34.3 | 63.7                                                                               | 44.4  | 21.5 | 55.6 | 14.8 | 0.0  | 0.0  | 0.0  | 0.0  | 0.0  |
| $\alpha$ 14  | 956    | 4.1      | 758                        | 79.3 | 232   | 24.3 | 26.6                                                                               | 51.3  | 25.3 | 47.0 | 44.1 | 1.7  | 4.0  | 0.0  | 0.0  | 0.0  |
| $\alpha$ 15  | 771    | 3.3      | 270                        | 35.0 | 112   | 14.5 | 42.6                                                                               | 48.2  | 57.4 | 32.1 | 0.0  | 19.6 | 0.0  | 0.0  | 0.0  | 0.0  |
| $\alpha$ 16  | 419    | 1.8      | 187                        | 44.6 | 29    | 6.9  | 34.8                                                                               | 100.0 | 65.2 | 0.0  | 0.0  | 0.0  | 0.0  | 0.0  | 0.0  | 0.0  |
| $\alpha$ 17  | 393    | 1.7      | 0                          | 0.0  | 93    | 23.7 | 0.0                                                                                | 95.7  | 0.0  | 4.3  | 0.0  | 0.0  | 0.0  | 0.0  | 0.0  | 0.0  |
| $\alpha$ 18  | 445    | 1.9      | 379                        | 85.2 | 201   | 45.2 | 31.7                                                                               | 49.8  | 24.5 | 49.8 | 26.9 | 1.0  | 5.0  | 0.0  | 11.9 | 0.0  |
| $\alpha$ 19  | 413    | 1.8      | 98                         | 23.7 | 46    | 11.1 | 100.0                                                                              | 23.9  | 0.0  | 76.1 | 0.0  | 0.0  | 0.0  | 0.0  | 0.0  | 0.0  |
| $\alpha$ 20  | 829    | 3.6      | 367                        | 44.3 | 73    | 8.8  | 44.4                                                                               | 90.4  | 39.5 | 9.6  | 16.1 | 0.0  | 0.0  | 0.0  | 0.0  | 0.0  |
| $\alpha$ 21  | 737    | 3.2      | 346                        | 47.0 | 203   | 27.5 | 100.0                                                                              | 91.1  | 0.0  | 8.9  | 0.0  | 0.0  | 0.0  | 0.0  | 0.0  | 0.0  |
| $\alpha$ 22  | 1159   | 5.0      | 844                        | 72.8 | 310   | 26.7 | 49.8                                                                               | 74.8  | 32.5 | 25.2 | 17.1 | 0.0  | 0.7  | 0.0  | 0.0  | 0.0  |
| $\alpha$ 23  | 364    | 1.6      | 307                        | 84.3 | 124   | 34.1 | 21.8                                                                               | 90.3  | 35.2 | 9.7  | 42.0 | 0.0  | 1.0  | 0.0  | 0.0  | 0.0  |
| $\alpha$ 24  | 267    | 1.2      | 126                        | 47.2 | 18    | 6.7  | 100.0                                                                              | 100.0 | 0.0  | 0.0  | 0.0  | 0.0  | 0.0  | 0.0  | 0.0  | 0.0  |
| $\alpha$ S01 | 170    | 0.7      | 83                         | 48.8 | 70    | 41.2 | 100.0                                                                              | 0.0   | 0.0  | 88.6 | 0.0  | 11.4 | 0.0  | 0.0  | 0.0  | 0.0  |
| $\alpha$ S02 | 221    | 1.0      | 213                        | 96.4 | 41    | 18.6 | 27.7                                                                               | 58.5  | 72.3 | 41.5 | 0.0  | 0.0  | 0.0  | 0.0  | 0.0  | 0.0  |
| $\alpha$ S03 | 125    | 0.5      | 78                         | 62.4 | 0     | 0.0  | 100.0                                                                              | 0.0   | 0.0  | 0.0  | 0.0  | 0.0  | 0.0  | 0.0  | 0.0  | 0.0  |
| $\alpha$ S04 | 443    | 1.9      | 189                        | 42.7 | 118   | 26.6 | 84.7                                                                               | 95.8  | 15.3 | 4.2  | 0.0  | 0.0  | 0.0  | 0.0  | 0.0  | 0.0  |
| $\alpha$ S05 | 191    | 0.8      | 135                        | 70.7 | 43    | 22.5 | 100.0                                                                              | 100.0 | 0.0  | 0.0  | 0.0  | 0.0  | 0.0  | 0.0  | 0.0  | 0.0  |
| $\alpha$ S06 | 265    | 1.1      | 117                        | 44.2 | 55    | 20.8 | 100.0                                                                              | 100.0 | 0.0  | 0.0  | 0.0  | 0.0  | 0.0  | 0.0  | 0.0  | 0.0  |
| $\alpha$ S07 | 92     | 0.4      | 0                          | 0.0  | 22    | 23.9 | 0.0                                                                                | 100.0 | 0.0  | 0.0  | 0.0  | 0.0  | 0.0  | 0.0  | 0.0  | 0.0  |
| $\alpha$ S08 | 257    | 1.1      | 75                         | 29.2 | 30    | 11.7 | 100.0                                                                              | 33.3  | 0.0  | 66.7 | 0.0  | 0.0  | 0.0  | 0.0  | 0.0  | 0.0  |
| $\alpha$ S09 | 58     | 0.3      | 0                          | 0.0  | 0     | 0.0  | 0.0                                                                                | 0.0   | 0.0  | 0.0  | 0.0  | 0.0  | 0.0  | 0.0  | 0.0  | 0.0  |
| $\alpha$ S10 | 44     | 0.2      | 0                          | 0.0  | 0     | 0.0  | 0.0                                                                                | 0.0   | 0.0  | 0.0  | 0.0  | 0.0  | 0.0  | 0.0  | 0.0  | 0.0  |
| Total        | 23172  | 100.0    | 12402                      | 53.5 | 6439  | 27.8 | 56.5                                                                               | 65.6  | 26.3 | 30.8 | 12.5 | 3.3  | 3.4  | 0.3  | 1.4  | 0.0  |

<sup>a</sup>Number of chromosome segments involved in synteny

Supplemental Table 5

Percentage of Cotton Chromosomal Regions Showing Duplications in Hypothetical Ancestral

Cotton Genome

| Cotton Chr. <sup>a</sup> | Length |          | Length of syntenic regions |      |       |      | % of total syntenic regions associated with indicated number of chromosomes |       |      |      |      |      |      |      |      |      |
|--------------------------|--------|----------|----------------------------|------|-------|------|-----------------------------------------------------------------------------|-------|------|------|------|------|------|------|------|------|
|                          | cM     | % genome | CS2                        |      | FISH  |      | CS2                                                                         | FISH  | CS2  | FISH | CS2  | FISH | CS2  | FISH | CS2  | FISH |
|                          |        |          | cM                         | %    | cM    | %    | 1 <sup>b</sup>                                                              | 1     | 2    | 2    | 3    | 3    | 4    | 4    | >5   | >5   |
| C01                      | 195.4  | 8.4      | 62.4                       | 31.9 | 38.7  | 19.8 | 47.4                                                                        | 61.8  | 39.1 | 21.4 | 13.5 | 12.7 | 0.0  | 4.1  | 0.0  | 0.0  |
| C02                      | 176.4  | 7.6      | 120                        | 68.0 | 46.0  | 32.0 | 58.8                                                                        | 99.1  | 36.6 | 0.9  | 4.7  | 0.0  | 0.0  | 0.0  | 0.0  | 0.0  |
| C03                      | 120.7  | 5.2      | 46.6                       | 40.8 | 45.2  | 39.6 | 45.3                                                                        | 80.5  | 47.4 | 19.5 | 7.3  | 0.0  | 0.0  | 0.0  | 0.0  | 0.0  |
| C04                      | 183.8  | 7.9      | 90.4                       | 49.2 | 27.4  | 14.9 | 47.3                                                                        | 32.1  | 26.1 | 67.9 | 13.2 | 0.0  | 7.9  | 0.0  | 5.5  | 0.0  |
| C05                      | 191.9  | 8.3      | 95.7                       | 49.9 | 83.8  | 43.7 | 46.4                                                                        | 67.7  | 23.6 | 23.2 | 15.8 | 9.2  | 7.9  | 0.0  | 6.3  | 0.0  |
| C06                      | 172.6  | 7.4      | 110.7                      | 64.1 | 72.4  | 41.9 | 37.8                                                                        | 36.2  | 35.3 | 63.8 | 23.7 | 0.0  | 3.3  | 0.0  | 0.0  | 0.0  |
| C07                      | 217.2  | 9.3      | 104.1                      | 47.9 | 34.1  | 15.7 | 39.6                                                                        | 100.0 | 47.3 | 0.0  | 13.2 | 0.0  | 00.0 | 0.0  | 0.0  | 0.0  |
| C08                      | 159.5  | 6.9      | 91.6                       | 57.4 | 19.3  | 12.1 | 61.2                                                                        | 94.3  | 15.9 | 5.7  | 14.5 | 0.0  | 8.3  | 0.0  | 0.0  | 0.0  |
| C09                      | 264.6  | 11.4     | 127.4                      | 48.1 | 72.8  | 27.5 | 57.7                                                                        | 80.1  | 21.0 | 16.1 | 14.1 | 3.8  | 4.8  | 0.0  | 2.4  | 0.0  |
| C10                      | 172.6  | 7.4      | 71.4                       | 41.4 | 12.7  | 7.4  | 65.3                                                                        | 100.0 | 34.7 | 0.0  | 0.0  | 0.0  | 0.0  | 0.0  | 0.0  | 0.0  |
| C11                      | 170.2  | 7.3      | 96.7                       | 56.8 | 40.8  | 24.0 | 49.5                                                                        | 83.1  | 10.9 | 16.7 | 18.6 | 0.2  | 14.6 | 0.0  | 6.4  | 0.0  |
| C12                      | 101.7  | 4.4      | 66.2                       | 65.1 | 30.6  | 30.1 | 51.4                                                                        | 69.0  | 11.2 | 20.6 | 14.7 | 10.5 | 14.5 | 0.0  | 8.3  | 0.0  |
| C13                      | 198.1  | 8.5      | 116.9                      | 59.0 | 40.3  | 20.3 | 49.0                                                                        | 100.0 | 14.1 | 0.0  | 9.2  | 0.0  | 7.3  | 0.0  | 20.4 | 0.0  |
| Total                    | 2324.7 | 100.0    | 1200.1                     | 51.8 | 564.1 | 24.3 | 50.6                                                                        | 73.8  | 27.1 | 22.6 | 12.8 | 3.3  | 5.3  | 0.3  | 4.1  | 0.0  |

<sup>a</sup>Based on hypothetical ancestral chromosomes: does not correspond to published nomenclature for modern tetraploid chromosomes (Rong et al 2004).

<sup>b</sup>Number of chromosome segments involved in synteny: data in columns is percentage of total syntenic regions associated with indicated numbers of chromosomes
